# Supplementary material for: Patient-Reported Distress and Problems Among Elderly Patients with Hematological Malignancy in Korea
Source: Research Square preprint supplement (doi:10.21203/rs.3.rs-1358599/v1), 2022-03-15
Supplement: Supplementary file 1 [file 81c022216b32688636d32712.docx]

**Supplementary material**

Table 1. The association between problems and distress (N = 132)

| Problem list | | Distress < 4  (N = 50)  N (%) | Distress ≥ 4  (N = 82)  N (%) | χ2 | *p* |
| --- | --- | --- | --- | --- | --- |
| Practical problems | |  |  |  |  |
|  | Transportation | 6 (17.1) | 29 (82.9) | 8.70 | 0.003 |
|  | Treatment decisions | 6 (21.4) | 22 (78.6) | 4.09 | 0.043 |
|  | Housing | 4 (16.7) | 20 (83.3) | 5.61 | 0.018 |
|  | Insurance/finances | 5 (23.8) | 16 (76.2) | 2.10 | 0.147 |
|  | Childcare a | 1 (50.0) | 1 (50.0) | NA | 0.616 |
|  | Work/school a | 0 (0) | 1 (100) | NA | 0.621 |
| Familial problems | |  |  |  |  |
|  | Family health issues | 8 (36.4) | 14 (63.6) | 0.03 | 0.872 |
|  | Dealing with partner | 3 (14.3) | 18 (85.7) | 5.91 | 0.015 |
|  | Dealing with children | 4 (33.3) | 8 (66.7) | 0.12 | 0.734 |
|  | Ability to have children | 0 (0) | 0 (0) | NA | NA |
| Emotional problems | |  |  |  |  |
|  | Worry | 19 (24.1) | 60 (75.9) | 15.99 | < 0.001 |
|  | Depression | 7 (13.7) | 44 (86.3) | 20.61 | < 0.001 |
|  | Fear | 7 (15.2) | 39 (84.8) | 15.41 | < 0.001 |
|  | Sadness | 11 (23.9) | 35 (76.1) | 5.85 | 0.016 |
|  | Nervousness | 6 (15.0) | 34 (85.0) | 12.77 | < 0.001 |
|  | Loss of interest in usual activities | 4 (10.3) | 35 (89.7) | 17.95 | < 0.001 |
| Spiritual/religious problem a | | 1 (20.0) | 4 (80.0) | NA | 0.649 |
| Physical problems | |  |  |  |  |
|  | Fatigue | 27 (33.8) | 53 (66.3) | 1.47 | 0.225 |
|  | Tingling in hands/feet | 27 (34.2) | 52 (65.8) | 1.15 | 0.284 |
|  | Getting around | 18 (29.0) | 44 (71.0) | 3.89 | 0.072 |
|  | Memory/concentration | 15 (28.3) | 38 (71.7) | 3.45 | 0.063 |
|  | Feeling swollen | 14 (28.6) | 35 (71.4) | 2.87 | 0.090 |
|  | Skin dry/itchy | 18 (38.3) | 29 (61.7) | 0.01 | 0.941 |
|  | Sleep | 11 (25.6) | 32 (74.4) | 4.10 | 0.043 |
|  | Pain | 8 (20.0) | 32 (80.0) | 7.80 | 0.005 |
|  | Constipation | 6 (18.8) | 26 (81.3) | 6.57 | 0.010 |
|  | Appearance | 9 (29.0) | 22 (71.0) | 1.35 | 0.246 |
|  | Nose dry/congested | 8 (30.8) | 18 (69.2) | 0.70 | 0.404 |
|  | Mouth sore | 6 (25.0) | 18 (75.0) | 2.07 | 0.521 |
|  | Bathing/dressing | 5 (21.7) | 18 (78.3) | 3.08 | 0.079 |
|  | Nausea | 7 (31.8) | 15 (68.2) | 0.41 | 0.521 |
|  | Changes in urination | 4 (20.0) | 16 (80.0) | 3.20 | 0.074 |
|  | Eating | 2 (10.0) | 18 (90.0) | 7.79 | 0.005 |
|  | Breathing | 4 (22.2) | 14 (77.8) | 2.17 | 0.141 |
|  | Indigestion | 7 (38.9) | 11 (61.1) | 0.01 | 0.924 |
|  | Diarrhea | 3 (18.8) | 13 (81.3) | 2.83 | 0.092 |
|  | Fever a | 3 (42.9) | 4 (57.1) | NA | 0.536 |
|  | Sexual a | 1 (25.0) | 3 (75.0) | NA | 0.511 |
|  | Substance abuse | 0 (0.0) | 0 (0.0) | NA | NA |

NA: not applicable

a Fisher’s exact test.
